# Supplementary material for: Effective Identification of Gram-Negative Bacterial Type III Secreted Effectors Using Position-Specific Residue Conservation Profiles
Source: PubMed Central journal article supplement (PMC3877298; doi:10.1371/journal.pone.0084439), 2013-12-31
Supplement: pone.0084439.s001.pdf [file pone.0084439.s001.pdf]

**Table S1.** The statistical result of the secreted proteins data.

| Secretory type | Number of sequences |
|----------------|---------------------|
| Type I         | 87                  |
| Type II        | 186                 |
| Type III       | 662                 |
| Type IV        | 72                  |
| Type V         | 269                 |
| Type VI        | 10                  |
| Type VII       | 150                 |
| Type VIII      | 13                  |
| Total          | 1449                |
