# Supplementary material for: Effective Identification of Gram-Negative Bacterial Type III Secreted Effectors Using Position-Specific Residue Conservation Profiles
Source: PubMed Central journal article supplement (PMC3877298; doi:10.1371/journal.pone.0084439), 2013-12-31
Supplement: pone.0084439.s002.pdf [file pone.0084439.s002.pdf]

**Table S2.** Feature importance measure. The discriminatory power of each feature was determined by calculating the importance value, with larger values indicating more relevant properties.

| order | Feature | score    | coverage ratio | order | Feature | score    | coverage ratio |
|-------|---------|----------|----------------|-------|---------|----------|----------------|
| 1     | RSA18   | 12.50037 | 0.018276       | 118   | SSH51   | 2.187703 | 0.003199       |
| 2     | RSA17   | 12.47672 | 0.018242       | 119   | SSE14   | 2.184221 | 0.003193       |
| 3     | Hydro   | 11.83881 | 0.017309       | 120   | SSC23   | 2.131799 | 0.003117       |
| 4     | RSA13   | 11.43465 | 0.016718       | 121   | SSC15   | 2.128444 | 0.003112       |
| 5     | RSA16   | 9.688938 | 0.014166       | 122   | SSE78   | 2.116347 | 0.003094       |
| 6     | RSA15   | 9.542987 | 0.013952       | 123   | SSE10   | 2.113245 | 0.00309        |
| 7     | RSA04   | 9.238153 | 0.013507       | 124   | SSC78   | 2.069273 | 0.003025       |
| 8     | Npc     | 8.940048 | 0.013071       | 125   | SSC22   | 1.992148 | 0.002913       |
| 9     | RSA19   | 8.635378 | 0.012625       | 126   | SSC24   | 1.986699 | 0.002905       |
| 10    | RSA24   | 8.577556 | 0.012541       | 127   | SSE36   | 1.963599 | 0.002871       |
| 11    | RSA14   | 8.496652 | 0.012423       | 128   | AAC(R)  | 1.910085 | 0.002793       |
| 12    | SSC10   | 8.297427 | 0.012131       | 129   | SSE30   | 1.902005 | 0.002781       |
| 13    | SSC09   | 8.150919 | 0.011917       | 130   | SSC29   | 1.900406 | 0.002778       |
| 14    | SSE66   | 8.093057 | 0.011832       | 131   | SSH22   | 1.845632 | 0.002698       |
| 15    | RSA21   | 8.009703 | 0.011711       | 132   | SSE09   | 1.834789 | 0.002683       |
| 16    | SSC06   | 7.648721 | 0.011183       | 133   | SSC76   | 1.809855 | 0.002646       |
| 17    | RSA09   | 7.20957  | 0.010541       | 134   | SSH27   | 1.799352 | 0.002631       |
| 18    | RSA20   | 7.189312 | 0.010511       | 135   | SSE52   | 1.784764 | 0.002609       |
| 19    | SSC07   | 7.10113  | 0.010382       | 136   | SSH24   | 1.774176 | 0.002594       |
| 20    | SSE58   | 7.02992  | 0.010278       | 137   | SSC48   | 1.763944 | 0.002579       |
| 21    | RSA11   | 6.937114 | 0.010142       | 138   | SSH23   | 1.726538 | 0.002524       |
| 22    | RSA12   | 6.9079   | 0.0101         | 139   | SSE20   | 1.689486 | 0.00247        |
| 23    | RSA28   | 6.713684 | 0.009816       | 140   | RSA39   | 1.67514  | 0.002449       |
| 24    | SSH76   | 6.707353 | 0.009807       | 141   | SSE50   | 1.654744 | 0.002419       |
| 25    | SSH14   | 6.701334 | 0.009798       | 142   | RSA71   | 1.626164 | 0.002378       |
| 26    | RSA27   | 6.464362 | 0.009451       | 143   | SSE26   | 1.604521 | 0.002346       |
| 27    | RSA30   | 6.412951 | 0.009376       | 144   | SSE28   | 1.553769 | 0.002272       |
| 28    | SSC08   | 6.345432 | 0.009277       | 145   | SSE03   | 1.545783 | 0.00226        |
| 29    | AAC(E)  | 6.332586 | 0.009259       | 146   | SSH25   | 1.532767 | 0.002241       |
| 30    | SSH13   | 6.285567 | 0.00919        | 147   | SSH97   | 1.517437 | 0.002219       |
| 31    | SSE75   | 6.252446 | 0.009141       | 148   | AAC(F)  | 1.51497  | 0.002215       |
| 32    | RSA26   | 6.221109 | 0.009096       | 149   | SSE96   | 1.454851 | 0.002127       |
| 33    | RSA25   | 6.121136 | 0.008949       | 150   | AAC(C)  | 1.454076 | 0.002126       |
| 34    | Ins     | 6.093531 | 0.008909       | 151   | SSE01   | 1.442234 | 0.002109       |
| 35    | RSA29   | 6.034851 | 0.008823       | 152   | SSE51   | 1.423141 | 0.002081       |
| 36    | SSH78   | 5.967348 | 0.008725       | 153   | SSE07   | 1.342402 | 0.001963       |
| 37    | SSH75   | 5.849446 | 0.008552       | 154   | SSE91   | 1.332524 | 0.001948       |
| 38    | AAC(H)  | 5.60215  | 0.008191       | 155   | SSC88   | 1.264829 | 0.001849       |
| 39    | SSH66   | 5.528172 | 0.008082       | 156   | SSC30   | 1.263246 | 0.001847       |
| 40    | RSA22   | 5.520251 | 0.008071       | 157   | SSE08   | 1.22434  | 0.00179        |

|    |        |          |          |     |        |          |          |
|----|--------|----------|----------|-----|--------|----------|----------|
| 41 | SSH15  | 5.375799 | 0.00786  | 158 | RSA02  | 1.220483 | 0.001784 |
| 42 | SSH94  | 5.313643 | 0.007769 | 159 | SSE18  | 1.206026 | 0.001763 |
| 43 | SSE71  | 5.270178 | 0.007705 | 160 | RSA05  | 1.196977 | 0.00175  |
| 44 | SSH68  | 5.213072 | 0.007622 | 161 | SSE06  | 1.191472 | 0.001742 |
| 45 | SSC11  | 5.145772 | 0.007523 | 162 | SSE25  | 1.188903 | 0.001738 |
| 46 | SSH71  | 5.055965 | 0.007392 | 163 | SSH32  | 1.185341 | 0.001733 |
| 47 | SSE12  | 4.912202 | 0.007182 | 164 | SSH33  | 1.164097 | 0.001702 |
| 48 | SSH58  | 4.885861 | 0.007143 | 165 | SSC58  | 1.125796 | 0.001646 |
| 49 | RSA10  | 4.83115  | 0.007063 | 166 | SSC50  | 1.121432 | 0.00164  |
| 50 | AAC(W) | 4.679322 | 0.006841 | 167 | SSH36  | 1.105506 | 0.001616 |
| 51 | RSA23  | 4.650376 | 0.006799 | 168 | SSE19  | 1.096961 | 0.001604 |
| 52 | SSH12  | 4.585779 | 0.006705 | 169 | SSE27  | 1.07182  | 0.001567 |
| 53 | SSE13  | 4.544851 | 0.006645 | 170 | SSH30  | 1.062404 | 0.001553 |
| 54 | Ali    | 4.489038 | 0.006563 | 171 | RSA01  | 1.041242 | 0.001522 |
| 55 | SSC26  | 4.483211 | 0.006555 | 172 | RSA36  | 1.025375 | 0.001499 |
| 56 | SSC20  | 4.410194 | 0.006448 | 173 | SSH28  | 0.94215  | 0.001377 |
| 57 | SSE76  | 4.398171 | 0.00643  | 174 | SSE97  | 0.940926 | 0.001376 |
| 58 | RSA08  | 4.146082 | 0.006062 | 175 | RSA35  | 0.933659 | 0.001365 |
| 59 | SSC21  | 4.061282 | 0.005938 | 176 | SSE15  | 0.888354 | 0.001299 |
| 60 | RSA03  | 4.02736  | 0.005888 | 177 | RSA51  | 0.882308 | 0.00129  |
| 61 | SSC19  | 3.997723 | 0.005845 | 178 | SSC33  | 0.8698   | 0.001272 |
| 62 | SSC05  | 3.996422 | 0.005843 | 179 | SSH35  | 0.84917  | 0.001242 |
| 63 | SSH18  | 3.938828 | 0.005759 | 180 | SSE35  | 0.833485 | 0.001219 |
| 64 | AAC(Y) | 3.908998 | 0.005715 | 181 | SSC75  | 0.814841 | 0.001191 |
| 65 | RSA06  | 3.88585  | 0.005681 | 182 | SSE17  | 0.805407 | 0.001178 |
| 66 | SSH03  | 3.833227 | 0.005604 | 183 | SSC94  | 0.77491  | 0.001133 |
| 67 | SSE94  | 3.742292 | 0.005471 | 184 | RSA33  | 0.774626 | 0.001133 |
| 68 | AAC(G) | 3.711456 | 0.005426 | 185 | SSE22  | 0.758862 | 0.001109 |
| 69 | SSC12  | 3.683457 | 0.005385 | 186 | SSH29  | 0.758718 | 0.001109 |
| 70 | SSH48  | 3.67855  | 0.005378 | 187 | AAC(P) | 0.730484 | 0.001068 |
| 71 | SSH08  | 3.605657 | 0.005272 | 188 | SSE16  | 0.6979   | 0.00102  |
| 72 | SSH17  | 3.58915  | 0.005248 | 189 | SSC39  | 0.694819 | 0.001016 |
| 73 | SSE11  | 3.578965 | 0.005233 | 190 | RSA66  | 0.682125 | 0.000997 |
| 74 | RSA78  | 3.556302 | 0.0052   | 191 | RSA94  | 0.670823 | 0.000981 |
| 75 | SSH50  | 3.540823 | 0.005177 | 192 | RSA32  | 0.666498 | 0.000974 |
| 76 | SSH04  | 3.53656  | 0.005171 | 193 | SSC52  | 0.658186 | 0.000962 |
| 77 | SSH07  | 3.535565 | 0.005169 | 194 | RSA58  | 0.642941 | 0.00094  |
| 78 | SSC27  | 3.494557 | 0.005109 | 195 | SSE99  | 0.628945 | 0.00092  |
| 79 | SSH96  | 3.470472 | 0.005074 | 196 | SSH99  | 0.602753 | 0.000881 |
| 80 | SSH19  | 3.408467 | 0.004983 | 197 | SSC91  | 0.55279  | 0.000808 |
| 81 | SSH52  | 3.370896 | 0.004928 | 198 | SSC32  | 0.50472  | 0.000738 |
| 82 | SSH16  | 3.303098 | 0.004829 | 199 | AAC(L) | 0.492132 | 0.00072  |
| 83 | SSE68  | 3.284656 | 0.004802 | 200 | SSE24  | 0.48633  | 0.000711 |
| 84 | SSH11  | 3.242988 | 0.004741 | 201 | RSA50  | 0.479863 | 0.000702 |

|     |        |          |          |     |        |          |          |
|-----|--------|----------|----------|-----|--------|----------|----------|
| 85  | SSC25  | 3.201518 | 0.004681 | 202 | SSC01  | 0.454024 | 0.000664 |
| 86  | SSH09  | 3.1918   | 0.004667 | 203 | SSE33  | 0.449089 | 0.000657 |
| 87  | SSH10  | 3.158168 | 0.004617 | 204 | SSC71  | 0.443392 | 0.000648 |
| 88  | RSA07  | 3.091508 | 0.00452  | 205 | SSE32  | 0.440712 | 0.000644 |
| 89  | AAC(K) | 3.011916 | 0.004404 | 206 | SSC35  | 0.417567 | 0.000611 |
| 90  | SSH05  | 2.874945 | 0.004203 | 207 | RSA88  | 0.39704  | 0.00058  |
| 91  | SSH20  | 2.840845 | 0.004153 | 208 | SSC99  | 0.388634 | 0.000568 |
| 92  | Nnc    | 2.816631 | 0.004118 | 209 | pI     | 0.341138 | 0.000499 |
| 93  | SSE48  | 2.793171 | 0.004084 | 210 | SSE88  | 0.232865 | 0.00034  |
| 94  | SSE04  | 2.728565 | 0.003989 | 211 | AAC(T) | 0.230398 | 0.000337 |
| 95  | SSC17  | 2.724339 | 0.003983 | 212 | SSC96  | 0.229375 | 0.000335 |
| 96  | SSH06  | 2.663606 | 0.003894 | 213 | AAC(Q) | 0.221955 | 0.000325 |
| 97  | SSC18  | 2.662152 | 0.003892 | 214 | SSE23  | 0.218592 | 0.00032  |
| 98  | SSC14  | 2.624227 | 0.003837 | 215 | SSC51  | 0.211508 | 0.000309 |
| 99  | SSC04  | 2.614711 | 0.003823 | 216 | SSC97  | 0.125201 | 0.000183 |
| 100 | SSH88  | 2.582176 | 0.003775 | 217 | SSC02  | 0.097291 | 0.000142 |
| 101 | SSH91  | 2.571108 | 0.003759 | 218 | RSA96  | 0.081052 | 0.000119 |
| 102 | SSH02  | 2.558985 | 0.003741 | 219 | AAC(D) | 0.05327  | 7.79E-05 |
| 103 | AAC(S) | 2.479211 | 0.003625 | 220 | RSA99  | 0.049331 | 7.21E-05 |
| 104 | SSC28  | 2.416009 | 0.003532 | 221 | SSC68  | 0.043424 | 6.35E-05 |
| 105 | AAC(A) | 2.398518 | 0.003507 | 222 | SSC66  | 0.005285 | 7.73E-06 |
| 106 | SSC13  | 2.375922 | 0.003474 | 223 | RSA68  | -0.03109 | —        |
| 107 | SSH39  | 2.372692 | 0.003469 | 224 | RSA75  | -0.05248 | —        |
| 108 | SSE05  | 2.358333 | 0.003448 | 225 | RSA97  | -0.06225 | —        |
| 109 | SSE21  | 2.28615  | 0.003342 | 226 | RSA48  | -0.06448 | —        |
| 110 | SSH26  | 2.263325 | 0.003309 | 227 | SSC36  | -0.0723  | —        |
| 111 | SSE02  | 2.256964 | 0.0033   | 228 | RSA91  | -0.1858  | —        |
| 112 | SSE39  | 2.253738 | 0.003295 | 229 | RSA52  | -0.21303 | —        |
| 113 | SSH01  | 2.246445 | 0.003284 | 230 | RSA76  | -0.2137  | —        |
| 114 | SSC16  | 2.236727 | 0.00327  | 231 | SSC03  | -0.5291  | —        |
| 115 | SSH21  | 2.22142  | 0.003248 | 232 | AAC(I) | -0.69302 | —        |
| 116 | AAC(V) | 2.220641 | 0.003247 | 233 | AAC(N) | -1.08187 | —        |
| 117 | SSE29  | 2.205237 | 0.003224 | 234 | AAC(M) | -1.39946 | —        |

AAC: amino acid composition; Three secondary structures: helix(SSH), beta strand (SSE) and coil (SSC); RSA: relative solvent accessibility; Six properties: theoretical pI, total number of negatively charged residues of Asp and Glu (Nnc) and positively charged residues of Arg and Lys (Npc), instability index (Ins), aliphatic index (Ali) and grand average hydrophobicity (Hydro).
