# Supplementary material for: Effective Identification of Gram-Negative Bacterial Type III Secreted Effectors Using Position-Specific Residue Conservation Profiles
Source: PubMed Central journal article supplement (PMC3877298; doi:10.1371/journal.pone.0084439), 2013-12-31
Supplement: pone.0084439.s003.pdf [file pone.0084439.s003.pdf]

**Table S3.** The prediction result of the final RF model on the independent dataset.

| No. of T3SPs | No. of non-T3 SPs | Sn (%) | Sp (%) | Acc (%) | MCC    | AUC    |
|--------------|-------------------|--------|--------|---------|--------|--------|
| 35           | 86                | 94.29  | 91.86  | 92.56   | 0.8303 | 0.9900 |
