# Supplementary material for: Effective Identification of Gram-Negative Bacterial Type III Secreted Effectors Using Position-Specific Residue Conservation Profiles
Source: PubMed Central journal article supplement (PMC3877298; doi:10.1371/journal.pone.0084439), 2013-12-31
Supplement: pone.0084439.s004.pdf [file pone.0084439.s004.pdf]

**Table S4.** The detailed prediction result for each testing protein with the predictive probability cut-off of 0.5 for T3SPs.

| Swiss-Prot ID | RF probability | T3SPs     | Swiss-Prot ID | RF probability | T3SPs     |
|---------------|----------------|-----------|---------------|----------------|-----------|
| A2A0X2        | 0.6032         | yes       | Q887C6        | 0.896          | yes       |
| A9MYP6        | 0.7284         | yes       | Q887D0        | 0.924          | yes       |
| B7V0T1        | 0.8188         | yes       | Q89T99        | 0.8204         | yes       |
| B8ZYE8        | 0.4972         | no        | Q8RP17        | 0.9924         | yes       |
| C6USR0        | 0.9288         | yes       | Q8ZQC8        | 0.8416         | yes       |
| D0ZRB2        | 0.6996         | yes       | Q9ANI0        | 0.7144         | yes       |
| D0ZVG2        | 0.706          | yes       | Q9FCY7        | 0.9292         | yes       |
| D2AJ72        | 0.732          | yes       | Q9FD10        | 0.8904         | yes       |
| D2TI21        | 0.8868         | yes       | Q9KH44        | 0.9212         | yes       |
| N0AC86        | 0.482          | no        | Q9L6W0        | 0.8968         | yes       |
| P18009        | 0.8976         | yes       | Q9WWH0        | 0.8976         | yes       |
| P18014        | 0.856          | yes       | Q9Z6N7        | 0.8524         | yes       |
| Q27R11        | 0.8216         | yes       | Q9Z747        | 0.9212         | yes       |
| Q31SR9        | 0.676          | yes       | Q9Z753        | 0.884          | yes       |
| Q327E0        | 0.91           | yes       | Q9Z7D6        | 0.6208         | yes       |
| Q47279        | 0.6544         | yes       | Q9Z7N3        | 0.5764         | yes       |
| Q4ZMD6        | 0.8648         | yes       | Q9Z7Y1        | 0.7532         | yes       |
| Q840G7        | 0.9172         | yes       |               |                |           |
| Swiss-Prot ID | RF probability | non-T3SPs | Swiss-Prot ID | RF probability | non-T3SPs |
| A7ZH66        | 0.7508         | yes       | Q07162        | 0.7084         | yes       |
| B4EYH3        | 0.9144         | yes       | Q09KJ5        | 0.6564         | yes       |
| B7LBY5        | 0.796          | yes       | Q0PAN9        | 0.6848         | yes       |
| B7MX50        | 0.6496         | yes       | Q0WA34        | 0.8952         | yes       |
| B7MX52        | 0.882          | yes       | Q1RDH0        | 0.9192         | yes       |
| B7NCM9        | 0.686          | yes       | Q3YL96        | 0.9612         | yes       |
| C8TQ66        | 0.8552         | yes       | Q46945        | 0.9204         | yes       |
| D2AJC0        | 0.7104         | yes       | Q54151        | 0.7684         | yes       |
| O32591        | 0.7204         | yes       | Q54450        | 0.8056         | yes       |
| O84419        | 0.5232         | yes       | Q54455        | 0.794          | yes       |
| O86164        | 0.786          | yes       | Q56806        | 0.8028         | yes       |
| O87657        | 0.9244         | yes       | Q59986        | 0.8052         | yes       |
| O87661        | 0.8028         | yes       | Q673F0        | 0.7672         | yes       |
| O88093        | 0.7932         | yes       | Q6D3F9        | 0.7036         | yes       |
| P04128        | 0.9324         | yes       | Q6D881        | 0.6288         | yes       |
| P05788        | 0.9156         | yes       | Q7B2V9        | 0.8544         | yes       |
| P07268        | 0.694          | yes       | Q7CL15        | 0.7048         | yes       |

|        |        |     |        |        |     |
|--------|--------|-----|--------|--------|-----|
| P08062 | 0.4124 | no  | Q7D2D9 | 0.2176 | no  |
| P08189 | 0.8804 | yes | Q7N8E9 | 0.91   | yes |
| P0C081 | 0.4416 | no  | Q7N8F0 | 0.942  | yes |
| P0C1A2 | 0.8516 | yes | Q7N8F1 | 0.8608 | yes |
| P11312 | 0.8768 | yes | Q8GH86 | 0.4352 | no  |
| P12730 | 0.9292 | yes | Q8RTZ9 | 0.9064 | yes |
| P13719 | 0.8756 | yes | Q8VLQ5 | 0.8752 | yes |
| P14212 | 0.8588 | yes | Q8VT81 | 0.3716 | no  |
| P15320 | 0.9016 | yes | Q92JF7 | 0.7412 | yes |
| P15377 | 0.4552 | no  | Q93RN3 | 0.7292 | yes |
| P15493 | 0.7324 | yes | Q9ALK7 | 0.7728 | yes |
| P16316 | 0.6148 | yes | Q9ALL1 | 0.9552 | yes |
| P16317 | 0.6388 | yes | Q9EZE7 | 0.8108 | yes |
| P16466 | 0.9    | yes | Q9I747 | 0.644  | yes |
| P21413 | 0.9248 | yes | Q9PJY1 | 0.5692 | yes |
| P24093 | 0.8644 | yes | Q9PL47 | 0.7376 | yes |
| P26876 | 0.7656 | yes | Q9RB65 | 0.8652 | yes |
| P33406 | 0.8668 | yes | Q9RHT3 | 0.7228 | yes |
| P35695 | 0.666  | yes | Q9XB65 | 0.6316 | yes |
| P43529 | 0.9496 | yes | Q9XD84 | 0.8108 | yes |
| P43660 | 0.9236 | yes | Q9Z393 | 0.7972 | yes |
| P44596 | 0.9328 | yes | Q9Z398 | 0.8592 | yes |
| P55128 | 0.5172 | yes | Q9Z3A1 | 0.8932 | yes |
| P62593 | 0.828  | yes | Q9Z896 | 0.8316 | yes |
| Q03011 | 0.9192 | yes | Q9Z898 | 0.8688 | yes |
| Q04681 | 0.9288 | yes | Q9ZNI5 | 0.4768 | no  |
