# Supplementary material for: Effective Identification of Gram-Negative Bacterial Type III Secreted Effectors Using Position-Specific Residue Conservation Profiles
Source: PubMed Central journal article supplement (PMC3877298; doi:10.1371/journal.pone.0084439), 2013-12-31
Supplement: pone.0084439.s005.pdf [file pone.0084439.s005.pdf]

**Table S5.** The prediction result of experimentally confirmed secreted proteins with the predictive probability cut-off of 0.5 for T3SPs.

| Species | Effector | RF probability | T3SPs |
|---------|----------|----------------|-------|
| Brady   | Q89N83   | 0.6372         | yes   |
| Brady   | Q89TP9   | 0.8444         | yes   |
| Meso    | Q79UN8   | 0.93           | yes   |
| Meso    | Q89BB8   | 0.946          | yes   |
| Meso    | Q89TL5   | 0.9268         | yes   |
| Meso    | Q989P6   | 0.7036         | yes   |
| Meso    | Q989P8   | 0.9512         | yes   |
| Meso    | Q9AMW4   | 0.8644         | yes   |
| Sino    | P55711   | 0.3000         | no    |
| Sino    | P55713   | 0.6876         | yes   |
| Sino    | Q50EL2   | 0.8036         | yes   |
| Sino    | Q5Y4S2   | 0.338          | no    |
| Sino    | Q7BMF3   | 0.7004         | yes   |
