# Supplementary material for: Effective Identification of Gram-Negative Bacterial Type III Secreted Effectors Using Position-Specific Residue Conservation Profiles
Source: PubMed Central journal article supplement (PMC3877298; doi:10.1371/journal.pone.0084439), 2013-12-31
Supplement: pone.0084439.s006.pdf [file pone.0084439.s006.pdf]

**Table S6.** Predicted novel secreted proteins in rhizobia that have not been confirmed experimentally with the predictive probability cut-off of 0.5 for T3SPs.

| Gene ID   | Swiss-Prot ID | Annotation                            | RF probability | T3SPs |
|-----------|---------------|---------------------------------------|----------------|-------|
| bll0275   | Q89XN3        | hypothetical protein                  | 0.8912         | yes   |
| bll1636   | Q89TY7        | hypothetical protein                  | 0.826          | yes   |
| bll1648   | Q89TX5        | hypothetical protein                  | 0.8116         | yes   |
| bll1796   | Q89TQ4        | hypothetical protein                  | 0.6884         | yes   |
| bll1797   | H7C7Y1        | hypothetical protein                  | 0.3768         | no    |
| bll1798   | H7C6P6        | hypothetical protein                  | 0.824          | yes   |
| bll1804   | H7C7U1        | hypothetical protein                  | 0.52           | yes   |
| bll1810   | H7C6P5        | hypothetical protein                  | 0.8292         | yes   |
| bll1840   | H7C7V0        | hypothetical protein                  | 0.8664         | yes   |
| bll1848   | Q89TN8        | hypothetical protein                  | 0.6984         | yes   |
| bll1877   | H7C6L9        | hypothetical protein                  | 0.8312         | yes   |
| bll5481   | Q89J03        | hypothetical protein                  | 0.6028         | yes   |
| bll5622   | Q89IL2        | hypothetical protein                  | 0.5208         | yes   |
| bll8244   | Q89BB8        | hypothetical protein                  | 0.946          | yes   |
| blr0325   | Q89XI9        | hypothetical protein                  | 0.7584         | yes   |
| blr0354   | Q89XG0        | hypothetical protein                  | 0.6528         | yes   |
| blr1704   | Q89TS9        | hypothetical protein                  | 0.9584         | yes   |
| blr1854   | H7C7W8        | hypothetical protein                  | 0.9124         | yes   |
| blr1869   | Q89TN2        | hypothetical protein                  | 0.8036         | yes   |
| blr5999   | Q89HJ2        | hypothetical protein                  | 0.7824         | yes   |
| blr6167   | Q89H28        | hypothetical protein                  | 0.2036         | no    |
| mll5027   | Q98CS5        | hypothetical protein                  | 0.5464         | yes   |
| mlr0825   | Q98LY1        | hypothetical protein                  | 0.8612         | yes   |
| mlr1025   | Q98LH0        | Transcriptional<br>regulatory protein | 0.1696         | no    |
| mlr3881   | Q98F89        | hypothetical protein                  | 0.0396         | no    |
| mlr5875   | Q98AS4        | hypothetical protein                  | 0.7204         | yes   |
| mlr6331   | Q989Q3        | hypothetical protein                  | 0.7908         | yes   |
| mlr7808   | Q984X0        | hypothetical protein                  | 0.9464         | yes   |
| Smed_0286 | A6U665        | hypothetical protein                  | 0.2292         | no    |
| Smed_0887 | A6U7W2        | hypothetical protein                  | 0.8476         | yes   |
| Smed_1170 | A6U8P1        | biotin-regulated<br>protein           | 0.7412         | yes   |
| Smed_1171 | A6U8P2        | peptidase M23B                        | 0.1732         | no    |
| Smed_4485 | A6UI05        | hypothetical protein                  | 0.6444         | yes   |
| Smed_4857 | A6UJ11        | hypothetical protein                  | 0.226          | no    |
| Smed_5711 | A6ULA4        | hypothetical protein                  | 0.7268         | yes   |
