# Supplementary material for: Effective Identification of Gram-Negative Bacterial Type III Secreted Effectors Using Position-Specific Residue Conservation Profiles
Source: PubMed Central journal article supplement (PMC3877298; doi:10.1371/journal.pone.0084439), 2013-12-31
Supplement: pone.0084439.s007.pdf [file pone.0084439.s007.pdf]

**Table S7.** The prediction results of the new T3SPs confirmed by Deng *et al.* (83).

| Protein name | Swiss-Prot ID | RF probability | T3SPs |
|--------------|---------------|----------------|-------|
| LifA/Efa1*   | B7UI23        | 0.986          | yes   |
| C_0814*      | B7UMR0        | 0.5232         | yes   |
| NleB1        | B7UI21        | 0.6272         | yes   |
| NleE         | B7UI22        | 0.8688         | yes   |
| EspG2        | B7UH72        | 0.518          | yes   |
| NleH2        | B7ULW4        | 0.7656         | yes   |
| EspF         | B7UM88        | 0.2472         | no    |
| Tir          | B7UM99        | 0.9276         | yes   |
| Map          | B7UMA0        | 0.7568         | yes   |
| EspH         | B7UMA2        | 0.3132         | no    |
| EspG         | B7UMC8        | 0.5836         | yes   |
| EspL         | B7UI20        | 0.8784         | yes   |
| NleG         | B7UNX2        | 0.6112         | yes   |
| NleB2        | B7UNX3        | 0.8412         | yes   |
| NleC         | B7UNX4        | 0.9728         | yes   |
| NleD         | B7UNX6        | 0.7776         | yes   |
| NleA         | B7UR60        | 0.9824         | yes   |
| NleF         | B7UR63        | 0.7592         | yes   |
| EspB         | Q05129        | 0.9396         | yes   |

\*denotes the novel effectors.
